# Supplementary material for: EVEREST study report 2: imaging and grading protocol, and baseline characteristics of a randomised controlled trial of polypoidal choroidal vasculopathy
Source: PubMed Central journal article supplement — Br J Ophthalmol. 2015 Mar 10;99(5):624–8. doi: 10.1136/bjophthalmol-2014-305674 (PMC4413842; doi:10.1136/bjophthalmol-2014-305674), 2015-03-10
Supplement: bjophthalmol-2014-305674-s1.pdf [file bjophthalmol-2014-305674-s1.pdf]

## **Appendix 1. Fluorescein and indocyanine green angiography imaging sequence.**

**Dynamic capture** (video angiography) for 30 seconds after the first appearance of the dye in the retinal (fluorescein angiography) or choroidal circulation (indocyanine green angiography).

**Still-frame 30-degree stereo pair images using automated real time setting** as follows:

1 min – 1 min 59 sec: 1 stereo pair of **study** eye

2 min – 2 min 59 sec: 1 stereo pair of *fellow* eye

3 min – 3 min 59 sec: 1 stereo pair of **study** eye

4 min – 4 min 59 sec: 1 stereo pair of *fellow* eye

5 min – 5 min 59 sec: 1 stereo pair of **study** eye

10min- 10min 59sec: 1 stereo pair of **study** eye

11min- 11min 59sec: 1 stereo pair of *fellow* eye

20min- 20min 59sec: 1 stereo pair of **study** eye

21min- 21min 59sec: 1 stereo pair of *fellow* eye
